# Supplementary material for: Supporting Return to Work after Breast Cancer: A Mixed Method Study
Source: Healthcare (Basel). 2023 Aug 19;11(16):2343. doi: 10.3390/healthcare11162343 (PMC10454012; doi:10.3390/healthcare11162343)
Supplement: Supplementary file 1 [file healthcare-11-02343-s001.zip › healthcare-2544892-supplementary.pdf]

## **Supplement S1. Outline-Guide for the Structured Interview “Return To Work After Breast Cancer”**

### **PRELIMINARY DATA ON PHYSIOLOGICAL HISTORY:**

- married (yes/no)
- number of children
- physical activity
- nutrition
- diuresis/alvus
- height
- weight
- disability (recognized by evaluation commission)

### **1) HEALTH PROBLEMS**

- Family medical history, focused on:
  - Familiarity for cancer
  - Familiarity for autoimmune diseases
- Remote pathological anamnesis, focused on:
  - Autoimmune diseases
  - Trauma/accidents
  - Past functional impairments or limitations
  - Past medications
- Current health status, focused on breast cancer:
  - Histological type
  - TNM Stadiation/Grading
  - Diagnostic process (how she noticed it)
  - Treatment course (mammogram, biopsy, CT scan, MRI, neoadjuvant chemo/radiation, surgery, adjuvant chemo/radiation)
  - Chemotherapy currently administered (specify)
  - Legally recognized disability (yes/no)
- Clinical outcomes of therapies:
  - Any disabling physical problems? (yes/no)
    - Functional limitations of the range of motion for the arms
    - Muscle strength/muscle tone
    - Pain
    - Lymphedema
    - Asthenia
    - Fatigue

- Lifestyle changes
- Any disabling mental problems? (yes/no)
  - Cognitive impairment
  - Anxiety/depression
  - Psychological support ongoing program
  - Lifestyle changes

## **2) WORK AND RELATIONSHIP WITH THE MANAGEMENT**

- Age of starting work
- Job history (what, where, how long)
- Current job (professional category)
- Specific tasks performed in the current job (professional activities)
- Last fitness-to-work issued by your occupational physician:
  - Has she returned to work yet?
    - If yes: any prescriptions or limitations?
    - If no: choose one among: sick leave – vacation – leave from work
- Main issues at work:
  - With colleagues
  - With managers
  - Workstations and tools
  - Personal protective equipment
  - Other (specify)
- Qualitative perception of working with sickness/after sickness:
  - How do you feel about this situation?
  - What are your fears?
  - Do you feel able to do everything like before?
  - Are you afraid of being discriminated against/discharged?
  - Do you think that going back to work will have positive consequences in your life?
  - Other (specify)

## **3) QUALITY OF WORK ORGANIZATION**

- Please, fill in the Organizational Justice Questionnaire.

## VISITA MEDICINA DEL LAVORO

Data di compilazione |\_\_|\_\_|\_\_|

Cognome e nome .....

Nato il |\_\_|\_\_|\_\_| a ..... Nazion.: .....

Domicilio abituale ..... tel.: .....

Mail: .....

Stato familiare: Singola ☐ Con partner Senza figli ☐ Con figli ☐  
 Studio: Media inferiore ☐ Diploma ☐ Laurea ☐  
 Reddito tra 0 e 15mila ☐ Tra 15 e 28 mila ☐ Tra 28 e 55mila ☐ Oltre 55mila ☐  
 Peso: Altezza: Residenza: città ☐ Paese, campagna: ☐

F1. Che tipo di attività fisica svolgi più regolarmente: .....

F2. Quante volte a settimana pratichi questo esercizio fino a sudare? 0 1-2 3-4 5-7

F3. Quanto tempo dedichi ogni volta a questo esercizio? &lt;15' 16-30' 31-60' &gt;60'

Classe tumore: I ☐ II ☐ III ☐ IV ☐  
 Trattamento: Chir. ☐ Radio ☐ Chemio ☐ Adiuvante ☐  
 Ha già ripreso il lavoro? NO ☐ SI ☐ Invalidità %.....  
 Problemi del sonno ☐ Facile stancabilità ☐ Dolore spalla/braccio ☐ Linfedema ☐  
 Difficoltà concentrazione ☐ Deficit memoria ☐

### Anamnesi Lavorativa

Mansioni svolte presso l'azienda attuale (Dati forniti dal lavoratore)

| Dal | al | Mansione |
|-----|----|----------|
|     |    |          |
|     |    |          |

Fattori di rischio

Giudizio sul grado di esposizione (1 = lieve, 2 = intensa)

1. \_\_\_\_\_ |\_\_|  
 2. \_\_\_\_\_ |\_\_|  
 3. \_\_\_\_\_ |\_\_|

Orario di lavoro: (ore/sett. effettive medie) |\_\_|\_\_|

Lavoro notturno (turni effettuati al mese) |\_\_|

Pendolarismo (tempo per raggiungere il lavoro) |\_\_|\_\_|

| Anni | Lavori precedenti: Attività | Rischi |
|------|-----------------------------|--------|
|      |                             |        |

## Sintesi

### Classificazione del rischio

- |                                                         |                                                                   |                                            |                                                 |
|---------------------------------------------------------|-------------------------------------------------------------------|--------------------------------------------|-------------------------------------------------|
| <input type="checkbox"/> movimentazione manuale carichi | <input type="checkbox"/> sovraccarico biomeccanico arti superiori | <input type="checkbox"/> agenti chimici    | <input type="checkbox"/> cancerogeni e mutageni |
| <input type="checkbox"/> amianto                        | <input type="checkbox"/> silice libera cristallina                | <input type="checkbox"/> agenti biologici  | <input type="checkbox"/> videoterminali         |
| <input type="checkbox"/> vibrazioni corpo intero        | <input type="checkbox"/> vibrazioni mano braccio                  | <input type="checkbox"/> rumore            | <input type="checkbox"/> campi elettromagnetici |
| <input type="checkbox"/> radiazioni ottiche artificiali | <input type="checkbox"/> radiaz. UV naturali                      | <input type="checkbox"/> microclima severo | <input type="checkbox"/> infrasuoni             |
| <input type="checkbox"/> ultrasuoni                     | <input type="checkbox"/> atmosfere iperbariche                    | <input type="checkbox"/> lavoro notturno   | <input type="checkbox"/> radiazioni ionizzanti  |
| <input type="checkbox"/> altri rischi                   |                                                                   |                                            |                                                 |

| N  | Problemi attivi | Data | Altri problemi | Data |
|----|-----------------|------|----------------|------|
| 1  |                 |      |                |      |
| 2  |                 |      |                |      |
| 3  |                 |      |                |      |
| 4  |                 |      |                |      |
| 5  |                 |      |                |      |
| 6  |                 |      |                |      |
| 7  |                 |      |                |      |
| 8  |                 |      |                |      |
| 9  |                 |      |                |      |
| .. |                 |      |                |      |

### Note:

### Dichiarazioni del lavoratore:

*Il sottoscritto, presa visione del contenuto di questa scheda, dichiara che quanto riportato nell'anamnesi corrisponde a quanto dichiarato in ogni suo punto e che non ha sottaciuto notizie in riferimento ad eventi patologici pregressi o in corso. Inoltre, il sottoscritto esprime consenso alla gestione e al trattamento elettronico dei propri dati personali da parte del medico del lavoro, per scopi statistici o scientifici, secondo il Codice in materia di protezione dei dati personali (DL 30/6/03 n.196).*

*(data) ..... (firma) .....*

| Themes                 |                                                                                                                                                                                                                                                                                                                                                                                                                                                                                                                                                                                                                                                                                                                                                                                                                                                                                                                                                                                                                                                                                                                                                                                                                                                                                                                                                                                                                                                                                                                                                                                                                                                                                                                                                                                                                                                                                                                                                                                                                                                                                                                                                                                                                                            |                                                                                                                                                                                                                                                                                                                                                                                                                                                                                                                                                                                                                                                                                                                                                                                                                                                                                                                                                                                                                                                                                                                                                                                                                                                                                                                                                                                                                                                                |
|------------------------|--------------------------------------------------------------------------------------------------------------------------------------------------------------------------------------------------------------------------------------------------------------------------------------------------------------------------------------------------------------------------------------------------------------------------------------------------------------------------------------------------------------------------------------------------------------------------------------------------------------------------------------------------------------------------------------------------------------------------------------------------------------------------------------------------------------------------------------------------------------------------------------------------------------------------------------------------------------------------------------------------------------------------------------------------------------------------------------------------------------------------------------------------------------------------------------------------------------------------------------------------------------------------------------------------------------------------------------------------------------------------------------------------------------------------------------------------------------------------------------------------------------------------------------------------------------------------------------------------------------------------------------------------------------------------------------------------------------------------------------------------------------------------------------------------------------------------------------------------------------------------------------------------------------------------------------------------------------------------------------------------------------------------------------------------------------------------------------------------------------------------------------------------------------------------------------------------------------------------------------------|----------------------------------------------------------------------------------------------------------------------------------------------------------------------------------------------------------------------------------------------------------------------------------------------------------------------------------------------------------------------------------------------------------------------------------------------------------------------------------------------------------------------------------------------------------------------------------------------------------------------------------------------------------------------------------------------------------------------------------------------------------------------------------------------------------------------------------------------------------------------------------------------------------------------------------------------------------------------------------------------------------------------------------------------------------------------------------------------------------------------------------------------------------------------------------------------------------------------------------------------------------------------------------------------------------------------------------------------------------------------------------------------------------------------------------------------------------------|
|                        | Barriers                                                                                                                                                                                                                                                                                                                                                                                                                                                                                                                                                                                                                                                                                                                                                                                                                                                                                                                                                                                                                                                                                                                                                                                                                                                                                                                                                                                                                                                                                                                                                                                                                                                                                                                                                                                                                                                                                                                                                                                                                                                                                                                                                                                                                                   | Facilitators                                                                                                                                                                                                                                                                                                                                                                                                                                                                                                                                                                                                                                                                                                                                                                                                                                                                                                                                                                                                                                                                                                                                                                                                                                                                                                                                                                                                                                                   |
| Person-related Factors | <ul style="list-style-type: none"> <li>Physical problems (pain, fatigue)               <p>"Pain and tiredness deriving from therapies do not allow me to stay far from home for too long" (Patient 1)</p> <p>"I can't move heavy objects, especially if I have to place them on high shelves. Sometimes I drop things from my hand because my grip gives way." (Patient 4)</p> <p>"My arm has swollen causing me some problems with movement, but I have learnt to manage it over time. the thing that bothers me most is that someone in the office might notice the difference between my two arms." (Patient 7)</p> <p>"Low back pain is causing me severe pain crises. The new department to which I was assigned involves performing the activity in a standing position only." (Patient 12)</p> <p>"When my arm is immobile for a while, or when I wake up in the morning I often feel as if there are small needles in my shoulder and right arm. This also happens to me at work when I am sitting at my desk." (Patient 24)</p> <p>"My arm gets tired because I have to shift loads many times a day. Even if the loads don't weigh more than 10 kg, I have to move them several times a day." (Patient 8)</p> <p>"I can't stand up the whole work shift" (Patient 13)</p> </li> <li>Motivational blocks               <p>"I often feel tired, have a hard time concentrating. Sometimes have severe pain in my legs." (Patient 11)</p> <p>I think maybe I have been working too much, I already have 35 years of service, maybe I need to stop" (Patient 15)</p> <p>"The work I was doing was too modest for my abilities, now I wish the company would offer me something better now." (Patient 16)</p> <p>"I don't feel completely well, I need more time to fully recover."</p> <p>"The work environment was full of tension, I don't feel like going back into a stressful environment." (Patient 20)</p> </li> <li>Cognitive and neuropsychological problems (reduced concentration, decreased performance, apathy)               <p>"I don't want to go back to work because I'm tired and aware of the advanced stage of my disease, I'm severely depressed, and I don't feel like working." (Patient 18)</p> </li> </ul> | <ul style="list-style-type: none"> <li>Surgical breast reconstruction               <p>"Having my breast immediately reconstructed [Editor's note. after mastectomy] prevented damaging my female appearance and the image others have of me " (Patient 1)</p> <p>"I was very happy with the breast reconstruction in the same surgery, because it allowed me to go back to work and everyday life without changes in my appearance" (Patient 3)</p> <p>"The tumor was in an early stage so I only had to do surgery from which I recovered soon also thanks to breast reconstruction." (Patient 27)</p> </li> <li>Work engagement               <p>"I have always had a strong attachment to work, before the illness I had taken very few days off; now I am not very well but I would be very eager to start again." (Patient 2)</p> <p>"I feel good and am motivated to return to work, as long as I work "humane" hours [Editor's note: do not exceed the predetermined working hours] and I am not forced to work after hours." (Patient 10)</p> <p>"I really want to continue working; in fact, I have never even taken a single absence at work for my medical appointments." (Patient 12)</p> <p>"I am concerned about being placed in another office where it is known that the workload is greater than in other offices" (Patient 14)</p> <p>"I have always had a great desire to work, and I want to find it again." (Patient 24)</p> </li> </ul> |

"I get tired easily and have trouble concentrating, although I have already been back at work for a few weeks." (Patient 14)  
 "I fear that my work performance has decreased." (Patient 21)  
 "I don't want to hinder my colleagues in achieving company goals." (Patient 23)

|                         |                                                                                                                                                                                                                                                                                                                                                                                                                                                                                                                                                                                                                                                                                                                                                                                                                                                                                                                                                                                                                                                                                                                                                                                                                                                                                                                                                                                                                                                                                                                                                                                                                                                                                                                                                                                                                                                                                                                                                                                                                                                                                                                                                                                                                                  |                                                                                                                                                                                                                                                                                                                                                                                                                                                                                                                                                                                                                                                                                                                                                                                                                                                                                                                                                                                                                                                                                                                                                                                                                                                                                                                                                                                                                                                                                                                                                                               |
|-------------------------|----------------------------------------------------------------------------------------------------------------------------------------------------------------------------------------------------------------------------------------------------------------------------------------------------------------------------------------------------------------------------------------------------------------------------------------------------------------------------------------------------------------------------------------------------------------------------------------------------------------------------------------------------------------------------------------------------------------------------------------------------------------------------------------------------------------------------------------------------------------------------------------------------------------------------------------------------------------------------------------------------------------------------------------------------------------------------------------------------------------------------------------------------------------------------------------------------------------------------------------------------------------------------------------------------------------------------------------------------------------------------------------------------------------------------------------------------------------------------------------------------------------------------------------------------------------------------------------------------------------------------------------------------------------------------------------------------------------------------------------------------------------------------------------------------------------------------------------------------------------------------------------------------------------------------------------------------------------------------------------------------------------------------------------------------------------------------------------------------------------------------------------------------------------------------------------------------------------------------------|-------------------------------------------------------------------------------------------------------------------------------------------------------------------------------------------------------------------------------------------------------------------------------------------------------------------------------------------------------------------------------------------------------------------------------------------------------------------------------------------------------------------------------------------------------------------------------------------------------------------------------------------------------------------------------------------------------------------------------------------------------------------------------------------------------------------------------------------------------------------------------------------------------------------------------------------------------------------------------------------------------------------------------------------------------------------------------------------------------------------------------------------------------------------------------------------------------------------------------------------------------------------------------------------------------------------------------------------------------------------------------------------------------------------------------------------------------------------------------------------------------------------------------------------------------------------------------|
| Company-related factors | <ul style="list-style-type: none"> <li>• Work overload<br/>           "I don't want to be the only one who does nothing and be a burden to colleagues and subordinates and receive pitying treatment. My fear is that when I go back to work I won't have the same performance as before." (Patient 2)<br/>           "I am afraid that I cannot keep up with the work and in the coordination of the workers in my group for which I am responsible." (Patient 5)<br/>           "The workload that I faced before the illness is an exaggerated workload that even before the illness I was struggling to bear, but now I really would not be willing to bear, this makes me very afraid." (Patient 10)<br/>           "As a result of the deficit in my right arm, I am afraid that I will not sustain the pace of work as a waitress in the pizzeria and as a cook in the cafeteria, and also I am afraid of the late hour when my shift usually ends in the pizzeria." (Patient 24)<br/>           "They say the problem is over. My place in the company is still the same, I must provide the same services as before and continuously improve productivity. But I just can't do it." (Patient 30)<br/>           "I'm afraid I can't handle the heavier workloads that I managed previously." (Patient 32)</li> <li>• Work underload<br/>           "I was sidelined because of my situation (Editor's note. of fragility). They considered me unreliable and not suitable for being involved in projects because I had no future in the company. They preferred to count on someone who could offer them greater reliability ." (Patient 9)<br/>           "When they learned of my illness, they took away the job I was doing before. They effectively demoted me." (Patient 26)</li> <li>• Environmental and ergonomic factors<br/>           "The trolleys I have to use at work have faulty wheels and I have even more trouble moving them." (Patient 4)<br/>           "My incorrect posture at work will make my health condition worse"; "I don't think I can stand night shifts any longer." (Patient 24)<br/>           "Changing my workplace is a source of severe stress for me." (Patient 26)</li> </ul> | <ul style="list-style-type: none"> <li>• Policies for RTW<br/>           "My employer is extremely helpful in promoting a gradual return to work, so that I can avoid excessive fatigue." (Patient 7)</li> <li>• Ergonomic and schedule adjustments<br/>           "My Occupational Physician has already excluded me from heavy work such as guards, inspections, heavy work and physical efficiency tests." (Patient 15)</li> <li>• Social support from colleagues and superiors<br/>           "My colleagues write to me and encourage me to keep going so I can get back to work as soon as possible and they promised me that when I get back I can count on their support." (Patient 2)<br/>           After a company decision to change the department, I was assigned to a department with a boss who understands and appreciates my skills." (Patient 4)<br/>           "My colleagues are willing to help me in the most onerous activities" (Patient 6)<br/>           "My colleagues were willing to help me and arrange shifts so that I can avoid night shifts. It is a well organized company." (Patient 9)<br/>           "When I have to mobilize someone, colleagues help me. Same thing for distributing meals. (Editor's note. she was a Health Care Assistant)" (Patient 13)<br/>           "I have very helpful colleagues, and since my surgery I have stopped traveling." (Patient 19)<br/>           "I have a convenient work schedule and my colleagues are helpful and cooperative. There's a peaceful work atmosphere" (Patient 20)</li> </ul> |
|-------------------------|----------------------------------------------------------------------------------------------------------------------------------------------------------------------------------------------------------------------------------------------------------------------------------------------------------------------------------------------------------------------------------------------------------------------------------------------------------------------------------------------------------------------------------------------------------------------------------------------------------------------------------------------------------------------------------------------------------------------------------------------------------------------------------------------------------------------------------------------------------------------------------------------------------------------------------------------------------------------------------------------------------------------------------------------------------------------------------------------------------------------------------------------------------------------------------------------------------------------------------------------------------------------------------------------------------------------------------------------------------------------------------------------------------------------------------------------------------------------------------------------------------------------------------------------------------------------------------------------------------------------------------------------------------------------------------------------------------------------------------------------------------------------------------------------------------------------------------------------------------------------------------------------------------------------------------------------------------------------------------------------------------------------------------------------------------------------------------------------------------------------------------------------------------------------------------------------------------------------------------|-------------------------------------------------------------------------------------------------------------------------------------------------------------------------------------------------------------------------------------------------------------------------------------------------------------------------------------------------------------------------------------------------------------------------------------------------------------------------------------------------------------------------------------------------------------------------------------------------------------------------------------------------------------------------------------------------------------------------------------------------------------------------------------------------------------------------------------------------------------------------------------------------------------------------------------------------------------------------------------------------------------------------------------------------------------------------------------------------------------------------------------------------------------------------------------------------------------------------------------------------------------------------------------------------------------------------------------------------------------------------------------------------------------------------------------------------------------------------------------------------------------------------------------------------------------------------------|

|                         |                                                                                                                                                                                                                                                                                                                                                                                                                                                                                                                                                                                                                                                                                                                                                                                                                                                                                                                                                                                                                                                                                                                                                                                                                                                                                                                                                                                                                                                                                                      |                                                                                                                                                                                                                                                                                                                                                                                                                                                                                                                                                                                                                                                                                                                                                                                                                                                                                                                                                                                                                                           |
|-------------------------|------------------------------------------------------------------------------------------------------------------------------------------------------------------------------------------------------------------------------------------------------------------------------------------------------------------------------------------------------------------------------------------------------------------------------------------------------------------------------------------------------------------------------------------------------------------------------------------------------------------------------------------------------------------------------------------------------------------------------------------------------------------------------------------------------------------------------------------------------------------------------------------------------------------------------------------------------------------------------------------------------------------------------------------------------------------------------------------------------------------------------------------------------------------------------------------------------------------------------------------------------------------------------------------------------------------------------------------------------------------------------------------------------------------------------------------------------------------------------------------------------|-------------------------------------------------------------------------------------------------------------------------------------------------------------------------------------------------------------------------------------------------------------------------------------------------------------------------------------------------------------------------------------------------------------------------------------------------------------------------------------------------------------------------------------------------------------------------------------------------------------------------------------------------------------------------------------------------------------------------------------------------------------------------------------------------------------------------------------------------------------------------------------------------------------------------------------------------------------------------------------------------------------------------------------------|
|                         | <p>"I have to travel a long way to get to work. Commuting is a challenging factor for RTW" (Patient 25)</p> <p>"Being in the office with my colleagues makes me afraid of contracting COVID-19." (Patient 28)</p> <p>"When the manager learned that I was sick, he arranged for my transfer to a work location closer to my home. I know I can ask to be moved closer to home because I am severely handicapped, but I have no intention of doing that. I don't want to transfer, I don't feel able to fit into a work environment that I don't know." (Patient 31)</p> <ul style="list-style-type: none"> <li>• Inadequate shifts <p>"My job involves night shifts and I am afraid that they may worsen my health condition" (Patient 9)</p> <p>"I know that working nights could make my condition worse, but I have to continue working about two night shifts a week. I can't refuse because I am hired as a freelancer." (Patient 27)</p> <p>"I think I can no longer sustain night shifts." (Patient 24)</p> <p>"My work schedule and the need for in-person meetings may destabilize my work-life balance with regard to the ongoing treatment." (Patient 28)</p> </li> <li>• Employer's request for work ability assessment <p>"When the pandemic broke out, the manager sent me to a medico-legal board to assess whether I could continue working in contact with children, and the board decided that I was unfit for work because of the risk of infection." (Patient 3)</p> </li> </ul> |                                                                                                                                                                                                                                                                                                                                                                                                                                                                                                                                                                                                                                                                                                                                                                                                                                                                                                                                                                                                                                           |
| Society-related factors | <ul style="list-style-type: none"> <li>• Unequal access to welfare benefits <p>"Access to smart working from home was granted only to people with oncological conditions undergoing treatment with immunosuppressive drugs, thus creating a human capital management disparity between companies that provide flexible work and others." (Patient 19)</p> <p>"I had a fixed-term contract that expired while I was on sick leave, and it was not renewed." (Patient 12)</p> <p>"I have been found to be temporarily unfit for duty, with Contraindications for performing any duties involving mental or physical stress." (Patient 17)</p> </li> <li>• Family conflict <p>"My fiancé left me after the end of chemotherapy." (Patient 1)</p> <p>"I am separated from my husband, he knows I am not well, but he always fusses when he has to send me money for our child maintenance. I can't pay the rent at home." (Patient 4)</p> </li> </ul>                                                                                                                                                                                                                                                                                                                                                                                                                                                                                                                                                    | <ul style="list-style-type: none"> <li>• Telecommuting, teleworking <p>"Teleworking allowed me not to lose job opportunities because I continued to write articles and maintain correspondence from home" (Patient 1)</p> <p>"They tried to make me do smart working, but with kindergarten children it wasn't successful." (Patient 3)</p> <p>"They made me work in smart working." (Patient 4)</p> <p>"Fortunately, in the bank where I work, telecommuting is a mode already used before the pandemic" (Patient 5)</p> <p>"I have a great dedication to work, during sick leave I still helped colleagues from home" (Patient 14)</p> <p>"My job not physically taxing because I work purely on a PC, I currently work smartworking except for one day a week when I physically go to the office." (Patient 21)</p> <p>"I work mostly on a PC and when I am tired I have the opportunity to work from home in smart-working." (Patient 19)</p> <p>"My job allows me to go to attendance only once a week" (Patient 22)</p> </li> </ul> |

|                                                                                                                                      |                                                                                                                                                                                                                                                                                                                                                                                                                                                                                                                                                                                                                                                                                                                                                                                                                                                                                                                                                      |
|--------------------------------------------------------------------------------------------------------------------------------------|------------------------------------------------------------------------------------------------------------------------------------------------------------------------------------------------------------------------------------------------------------------------------------------------------------------------------------------------------------------------------------------------------------------------------------------------------------------------------------------------------------------------------------------------------------------------------------------------------------------------------------------------------------------------------------------------------------------------------------------------------------------------------------------------------------------------------------------------------------------------------------------------------------------------------------------------------|
| <p>"My partner tried to take advantage of my condition to obtain custody of the children in the separation lawsuit." (Patient 4)</p> | <p>"The use of telecommuting has not affected work performance so far, but I do not feel able to hold up the office hours I did before the illness." (Patient 23)</p> <p>"Paradoxically, with the pandemic, the possibility of going to the office a few days a week allows me to be calmer. I am afraid of becoming infected with COVID-19." (Patient 28)</p> <p>"Working almost exclusively from my computer gave me the opportunity to work from home after the surgery. It was very helpful" (Patient 29)</p> <ul style="list-style-type: none"> <li>• Legal &amp; welfare benefits for workers with cancer</li> </ul> <p>"Mine is an officer position in the administration and commissariat, so fortunately I can perform (by Law) my duties mostly on the PC." (Patient 15)</p> <ul style="list-style-type: none"> <li>• Social support from family members</li> </ul> <p>"My partner, who is also a nurse, helps me a lot." (Patient 27)</p> |
|--------------------------------------------------------------------------------------------------------------------------------------|------------------------------------------------------------------------------------------------------------------------------------------------------------------------------------------------------------------------------------------------------------------------------------------------------------------------------------------------------------------------------------------------------------------------------------------------------------------------------------------------------------------------------------------------------------------------------------------------------------------------------------------------------------------------------------------------------------------------------------------------------------------------------------------------------------------------------------------------------------------------------------------------------------------------------------------------------|

**Table S1.** Extensive participants' answers from the semi-structured interview questionnaire.
